# Supplementary material
Source: publisher figshare collection journal article supplement (https://acs.figshare.com/ndownloader/files/22679198)
Supplement: Supplementary file 1 [file 22679198]

## Supporting Information

### A novel tool to investigate the early and late-stages of alpha-synuclein aggregation

Sumanta Ghosh<sup>†a</sup>, Sakshi<sup>†b</sup>, Bikash Chandra Swain<sup>b</sup>, Ritobrita Chakraborty<sup>a</sup>, Umakanta Tripathy<sup>\*b</sup>, Krishnananda Chattopadhyay<sup>\*a</sup>

*<sup>a</sup>Structural Biology and Bioinformatics Division; Indian Institute of Chemical Biology (CSIR-IICB); 4 Raja S. C. Mullick Road, Kolkata, Country. India 700032;*

*<sup>b</sup>Department of Physics, Indian Institute of Technology (Indian School of Mines), Dhanbad-826004, Jharkhand, India.*

**\*Corresponding authors:** Umakanta Tripathy (E-mail: [utripathy@iitism.ac.in](mailto:utripathy@iitism.ac.in)); Krishnananda Chattopadhyay (Email: [krish@iicb.res.in](mailto:krish@iicb.res.in)).

**<sup>†</sup>Equal Contribution**

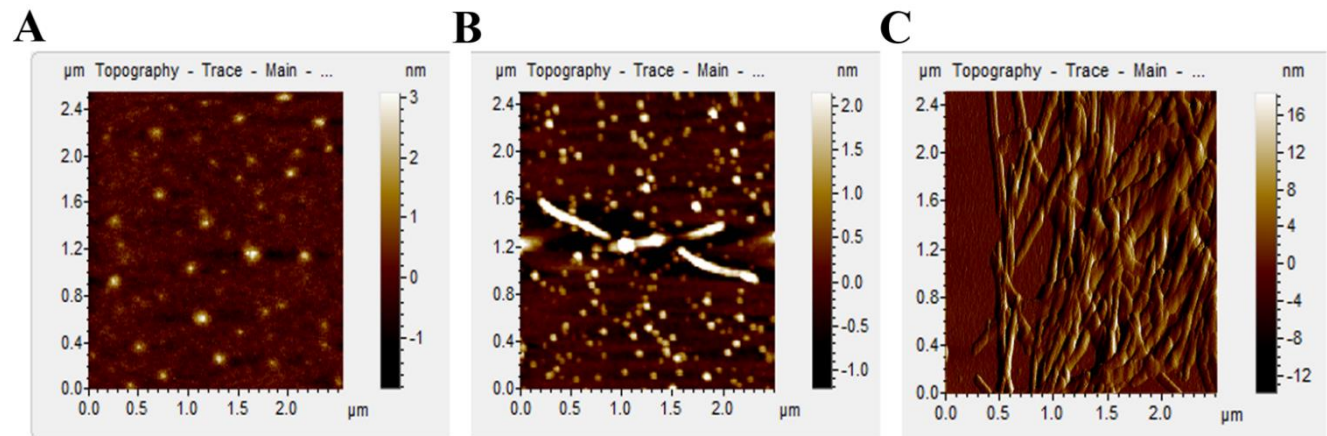

**Figure S1:** AFM images of  $\alpha$ -syn after A) 8, B) 22, and C) 48 h of incubation.

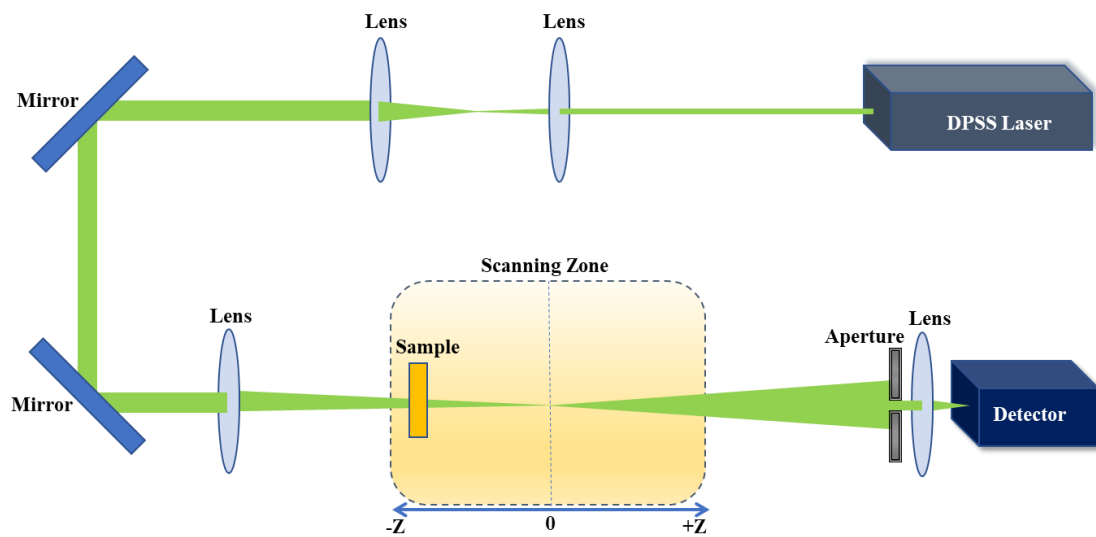

**Figure S2.** Layout of a CA Z-scan experimental setup.
